# Supplementary material
Source: MDPI journal article supplement (https://www.mdpi.com/2313-0105/6/3/46)
Supplement: s1 [file s1]

**Table S1.** Adsorption energy of long chain polysulfides ( $\text{Li}_2\text{S}_x$ ,  $x=4,6,8$ ) on the Al-doped graphene substrate.

| Substrate               | Adsorption energy [eV] |
|-------------------------|------------------------|
| $\text{Li}_2\text{S}_4$ | -2.19                  |
| $\text{Li}_2\text{S}_6$ | -2.32                  |
| $\text{Li}_2\text{S}_8$ | -2.31                  |

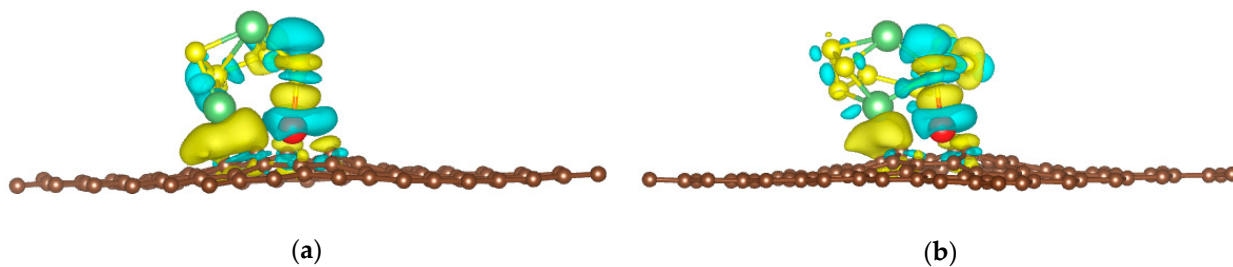

**Figure S1.** (a) Iso-surface (yellow color: negative, charge accumulation; cyan color: positive, charge depletion) of differential charge density for the most stable configurations of  $\text{Li}_2\text{S}_4$  (a) and  $\text{Li}_2\text{S}_8$  (b) on the Al-doped graphene. The plotted iso-level is  $1.5 \times 10^{-3} \text{ e/Bohr}^3$ . These densities have to be compared to figure 7 in the main text: no relevant modification of the differential electron densities is observed as a function of the polysulfide length.
